# Supplementary material for: In situ redox deposition of palladium nanoparticles on oxygen-deficient tungsten oxide as efficient hydrogenation catalysts
Source: Royal Society of Chemistry journal article supplement (doi:10.1039/c6ra26267h), 2017-01-01
Supplement: c6ra26267h1.pdf [file c6ra26267h1.pdf]

## Supporting Information

### ***In Situ* Redox Deposition of Palladium Nanoparticles on Oxygen-Deficient Tungsten Oxide as Efficient Hydrogenation Catalysts**

*Na Xue,<sup>a</sup> Rui-Jin Yu,<sup>a\*</sup> Cheng-Zong Yuan,<sup>b</sup> Xiao Xie,<sup>b</sup> Yi-Fan Jiang,<sup>b</sup> Hong-Yan Zhou,<sup>c</sup> Tuck-Yun Cheang,<sup>c\*</sup> and An-Wu Xu<sup>b\*</sup>*

*<sup>a</sup>College of Science, Northwest A&F University, Yangling, Shaanxi 712100, P. R. China.*

*<sup>b</sup>Division of Nanomaterials and Chemistry, Hefei National Laboratory for Physical Sciences at Microscale, University of Science and Technology of China, Hefei 230026, China.*

*<sup>c</sup>Department of Vascular Surgery, Department of Neurological Intensive Care Unit, the First Affiliated Hospital of Sun Yat-Sen University, Guangzhou, 510080, PR China.*

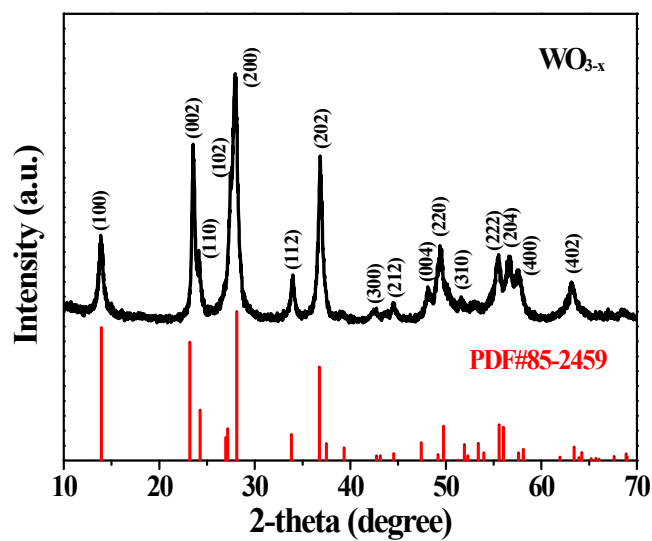

**Fig. S1** XRD pattern of as-prepared WO<sub>3-x</sub> nanowires. The standard card for hexagonal WO<sub>3</sub> (JCPDS no. 85-2459) is shown at the bottom.

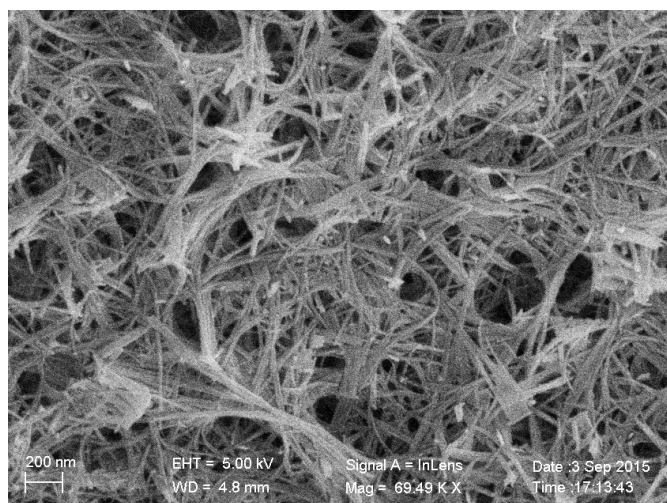

**Fig. S2** SEM image of WO<sub>3-x</sub> nanowires. The SEM image shows a macroporous surface morphology where nanowires (NWs) are interwoven together.

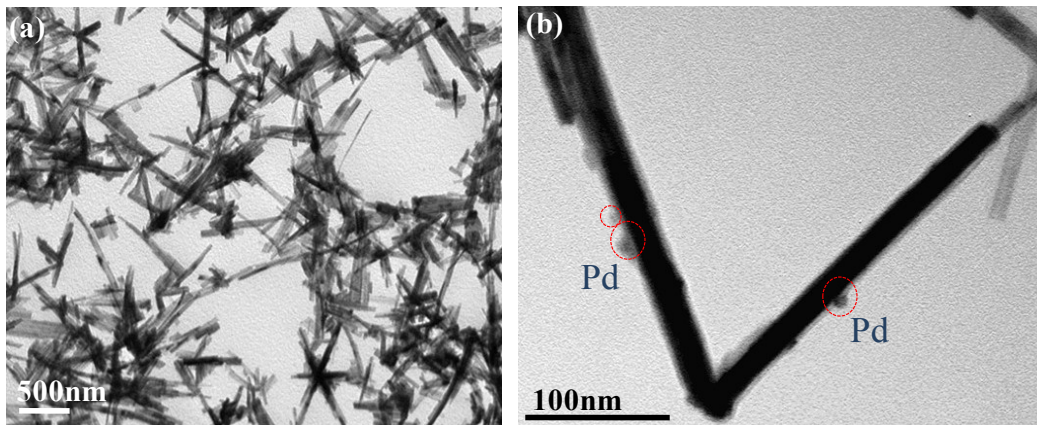

**Fig. S3** TEM image of obtained (a)  $\text{WO}_{3-x}$  NWs and (b) Pd/ $\text{WO}_{3-x}$  nanocomposites.

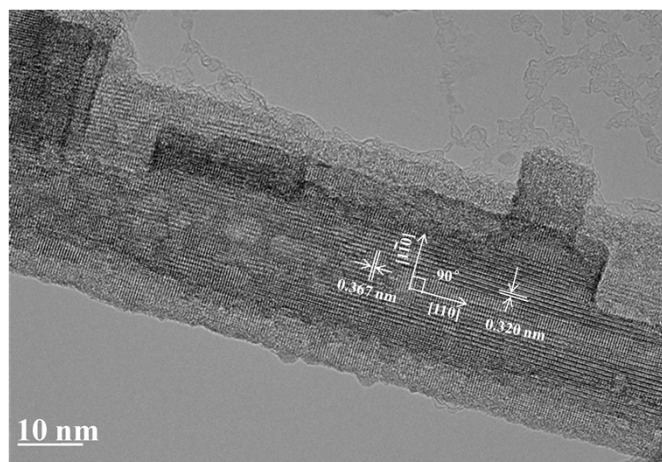

**Fig. S4** HRTEM image of  $\text{WO}_{3-x}$  NWs.

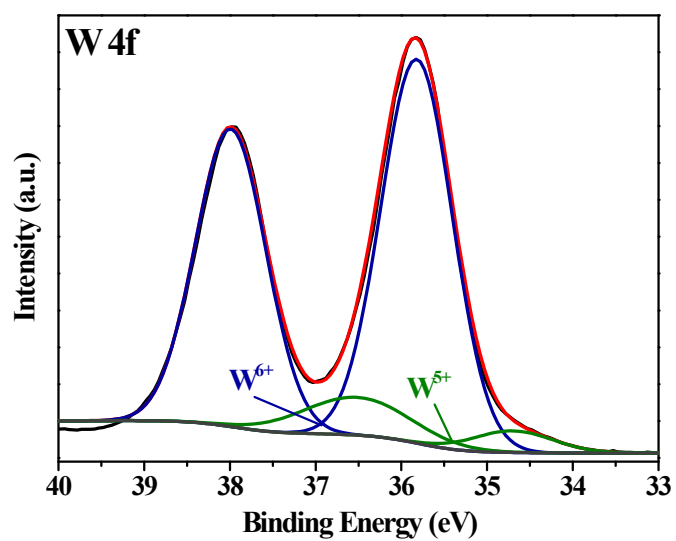

**Fig. S5** The W 4f spectrum of Pd/WO<sub>3-x</sub> nanocomposites. The relative content of W<sup>5+</sup> is estimated to be about 11.9 % after Pd deposition.

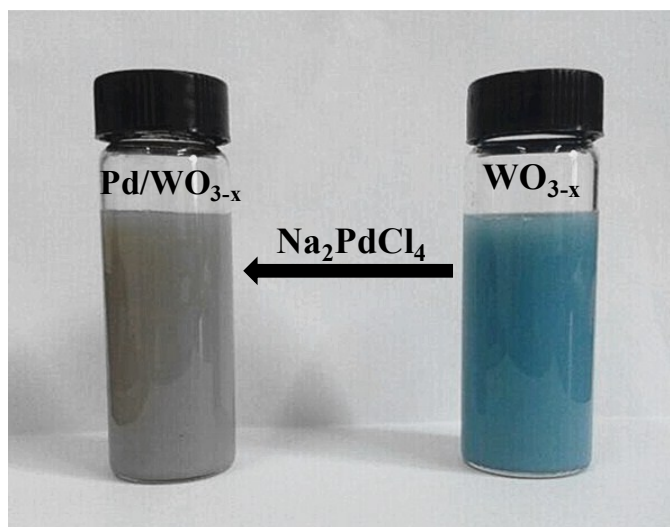

**Fig. S6** Optical photographs of WO<sub>3-x</sub> solutions before and after adding Na<sub>2</sub>PdCl<sub>4</sub> solutions, showing the color change.

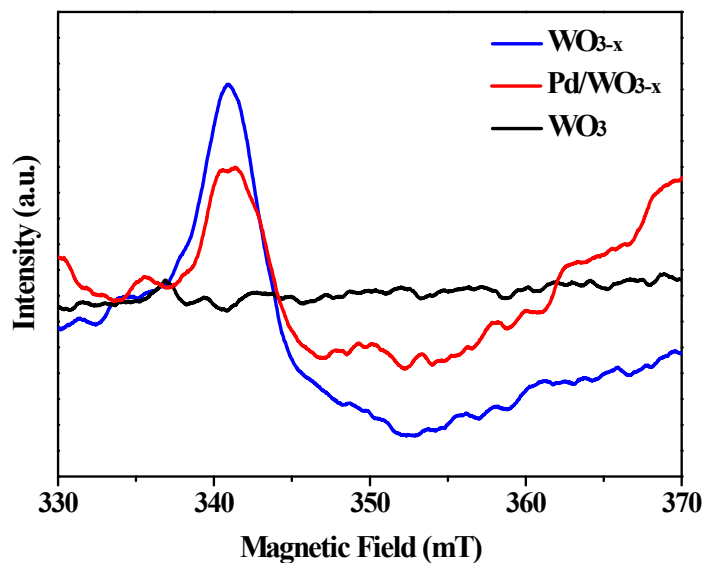

**Fig. S7** The X-band EPR spectra of commercial  $\text{WO}_3$ ,  $\text{WO}_{3-x}$  NWs and  $\text{Pd}/\text{WO}_{3-x}$  nanocomposites recorded at  $T = 298$  K.

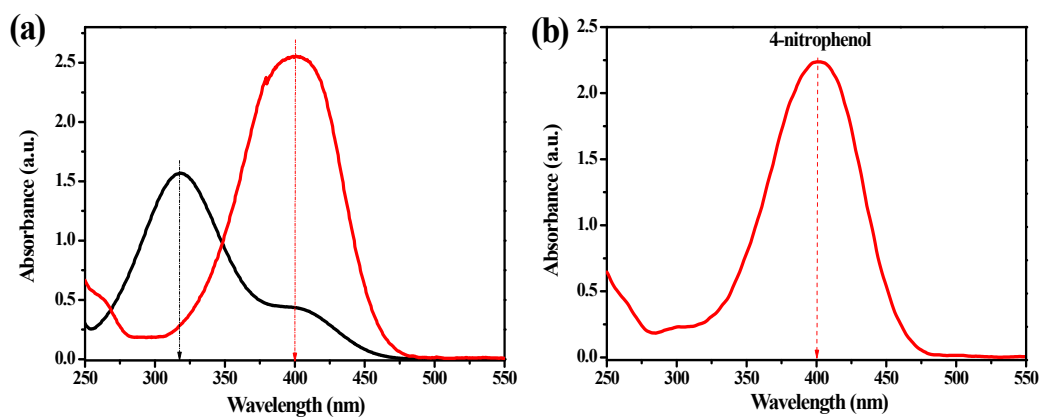

**Fig. S8** (a) UV-vis absorption spectra of 4-NP before (black line) and after addition of  $\text{NaBH}_4$  (red line). After adding  $\text{NaBH}_4$  solution into 4-NP solution, the aqueous 4-NP solution undergoes an immediate red-shift in the UV-vis absorbance band from 317 to 400 nm. (b) UV-visible absorption spectra of 4-NP at 400 nm. The intensity of the absorption peak of 4-nitrophenol is not reduced within 30 min in the presence of  $\text{NaBH}_4$ .

**Table S1.** Comparison of the activity of 4-NP reduction over Pd/WO<sub>3-x</sub> catalyst with other noble-metal loaded catalysts.

| Catalyst                                             | Metal content | Rate Constant , k (s <sup>-1</sup> ) | References                                                           |
|------------------------------------------------------|---------------|--------------------------------------|----------------------------------------------------------------------|
| Pd/WO <sub>3-x</sub>                                 | 0.99 wt%      | 4.5 × 10 <sup>-2</sup>               | This work                                                            |
| Fe <sub>x</sub> O <sub>y</sub> /Pd@mSiO <sub>2</sub> | 1.1 wt%       | 1.09 × 10 <sup>-3</sup>              | <i>Nanoscale</i> , 2013, <b>5</b> , 5896-5904 <sup>1</sup>           |
| Pd/NF-CNT <sup>a</sup>                               | 1.15 wt%      | 1.08 × 10 <sup>-3</sup>              | <i>Nanoscale</i> , 2014, <b>6</b> , 6609-6616 <sup>2</sup>           |
| Pd/MPC <sup>b</sup>                                  | 5.11 wt%      | 1.2 × 10 <sup>-2</sup>               | <i>J. Mater. Chem. A</i> , 2014, <b>2</b> , 18775-18785 <sup>3</sup> |

<sup>a</sup>NF-CNT: purified and oxidized carbon nanotubes. <sup>b</sup> MPC : magnetic porous carbon.

- 1 T. Yao, T. Cui, X. Fang, F. Cui and J. Wu, *Nanoscale*, 2013, **5**, 5896-5904.
- 2 X. Gu, W. Qi, X. Xu, Z. Sun, L. Zhang, W. Liu, X. Pan and D. Su, *Nanoscale*, 2014, **6**, 6609-6616.
- 3 Z. Dong, X. Le, Y. Liu, C. Dong and J. Ma, *J. Mater. Chem. A*, 2014, **2**, 18775-18785.
